# Supplementary material
Source: publisher figshare collection journal article supplement (https://acs.figshare.com/ndownloader/files/3781714)
Supplement: Supplementary file 1 [file 3781714]

## **Supporting Information**

### **Anion Recognition-Triggered Nanoribbon-Like Self-Assembly: A Novel Fluorescent Chemosensor for $\text{NO}_3^-$ in Acidic Aqueous Solution and Living Cells**

Yaping Yang, Shiyang Chen and Xin-Long Ni\*

Key Laboratory of Macrocyclic and Supramolecular Chemistry of Guizhou Province, Guizhou University, Guiyang 550025, China

E-mail: longni333@163.com

## Synthesis of 1-6

Scheme S1.

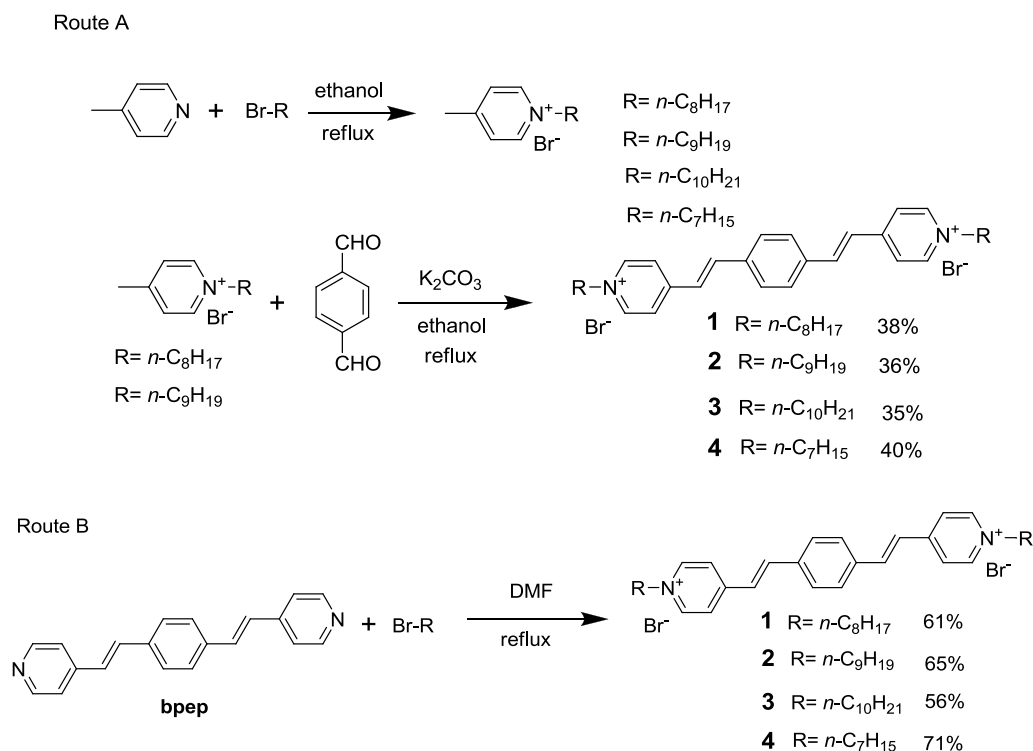

Scheme S2.

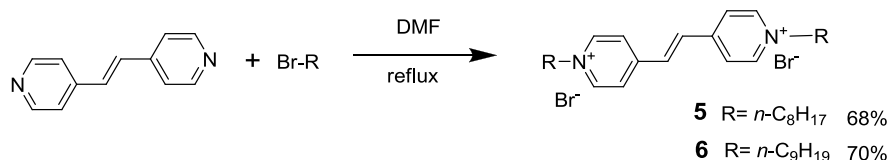

### Synthesis of 1-4.

**Route A.** we first synthesis of the compound **1-4** according to the reported literature.<sup>1</sup> For example, a mixture of Br-C<sub>8</sub>H<sub>17</sub> (770 mg, 4 mmol) and 4-picoline (560 mg, 6 mmol) in ethanol (10 mL) and was heated to reflux for 24 hours to obtain the corresponding 4-picolinium salt. Then the reaction mixture was cooled and an excess amount of 4-picoline was removed under vacuum followed by repeated washing with petroleum ether to give rise to a white solid. The 4-picolinium salt (860 mg, 3 mmol) and 1,4-Phthalaldehyde (200 mg, 1.45 mmol) were then dissolved in 20 mL ethanol, and an aqueous solution (0.5 mL) of 5 M NaOH was added dropwise into the ethanol solution under ice-cold conditions. The mixture was stirred under ice cold conditions for 4 hours, and then the reaction was quenched by acidification with 4M HCl. The precipitate was filtered and washed with ice-cold water. The crude product was dissolved in small amount of methanol and precipitated in ethyl acetate, followed by filtration and washed with ice-cold water again to obtain a yellow solid 210 mg (yield 21.6%).

**Route B.** A mixture of **bpep**<sup>2</sup> (285 mg, 1.0 mmol) and Br-C<sub>8</sub>H<sub>17</sub> (580 mg, 3.0 mmol) in DMF was refluxed for 48 hours. The resulting precipitate was filtered and washed with DMF and petroleum ether, and then dried under vacuum to obtain a yellow solid 410 mg (yield 61%).

Compared to **Route A.**, the modified synthetic **Route B.** is of simple experiment operation and higher yield for the target compounds, therefore, a similar method as **Route B** was used to prepare compounds **2-6**.

#### Characterizations of **1-6**

**1:**  $^1\text{H}$  NMR (500MHz, DMSO- $d_6$ ),  $\delta$  8.97-8.96 (d,  $J=5$  Hz, 4H, Ar-H), 8.25-8.23 (d,  $J=10$  Hz, 4H, Ar-H), 8.06-8.03 (d,  $J=15$  Hz, 2H, vinyl-H), 7.84 (s, 4H, Ar-H), 7.63-7.60 (d,  $J=15$  Hz, 2H, vinyl-H), 4.49-4.46 (t, 4H,  $\text{N}^+\text{-CH}_2$ ), 1.89-1.86 (t, 4H,  $\text{CH}_2$ ), 1.26-1.21 (m, 20H,  $\text{CH}_2$ ), 0.85-0.82 (t, 6H,  $\text{CH}_3$ ).  $^{13}\text{C}$  NMR (100 MHz,  $\text{CD}_3\text{OD}$ ): 155.12, 145.34, 141.78, 138.59, 130.10, 125.55, 125.27, 62.01, 32.89, 32.35, 30.21, 30.11, 27.23, 23.68, 14.42. MALDI-TOF:  $m/z$  calcd for  $\text{C}_{36}\text{H}_{50}\text{N}_2^{2+}$ : 510.79; found: 511.156; elemental analysis calcd (%) for  $\text{C}_{36}\text{H}_{50}\text{N}_2\text{Br}_2$ : C 64.48, H 7.52, N 4.18; found: C 64.53, H 7.58, N, 4.02.

**2:**  $^1\text{H}$  NMR (500MHz, DMSO- $d_6$ ),  $\delta$  8.97-8.96 (d,  $J=5$  Hz, 4H, Ar-H), 8.25-8.24 (d,  $J=5$  Hz, 4H, Ar-H), 8.06-8.03 (d,  $J=15$  Hz, 2H, vinyl-H), 7.84 (s, 4H, Ar-H), 7.63-7.60 (d,  $J=15$  Hz, 2H, vinyl-H), 4.49-4.46 (t, 4H,  $\text{N}^+\text{-CH}_2$ ), 1.89-1.87 (t, 4H,  $\text{CH}_2$ ), 1.25-1.21 (m, 24H,  $\text{CH}_2$ ), 0.83-0.81 (t, 6H,  $\text{CH}_3$ ).  $^{13}\text{C}$  NMR (100 MHz,  $\text{CD}_3\text{OD}$ ): 155.18, 145.33, 141.81, 138.61, 130.10, 125.56, 125.28, 62.03, 32.92, 32.38, 30.47, 30.29, 30.13, 27.21, 23.70, 14.42. MALDI-TOF:  $m/z$  calcd for  $\text{C}_{38}\text{H}_{54}\text{N}_2^{2+}$ : 538.85; found: 539.205; elemental analysis calcd (%) for  $\text{C}_{38}\text{H}_{54}\text{N}_2\text{Br}_2$ : C 65.33, H 7.79, N 4.01; found: C 65.21, H 7.83, N, 4.07.

**3:**  $^1\text{H}$  NMR (500MHz, DMSO- $d_6$ ),  $\delta$  8.97-8.95 (d,  $J=10$  Hz, 4H, Ar-H), 8.24-8.23 (d,  $J=5$  Hz, 4H, Ar-H), 8.05-8.02 (d,  $J=15$  Hz, 2H, vinyl-H), 7.84 (s, 4H, Ar-H), 7.63-7.59 (d,  $J=20$  Hz, 2H, vinyl-H), 4.49-4.46 (t, 4H,  $\text{N}^+\text{-CH}_2$ ), 1.91-1.86 (t, 4H,  $\text{CH}_2$ ), 1.25-1.21 (m, 28H,  $\text{CH}_2$ ), 0.83-0.80 (t, 6H,  $\text{CH}_3$ ). MALDI-TOF:  $m/z$  calcd for  $\text{C}_{40}\text{H}_{58}\text{N}_2^{2+}$ : 566.90; found: 567.451; elemental analysis calcd (%) for  $\text{C}_{40}\text{H}_{58}\text{N}_2\text{Br}_2$ : C 66.11, H 8.04, N 3.85; found: C 66.17, H 8.13, N, 3.71.

**4:**  $^1\text{H}$  NMR (500MHz, DMSO- $d_6$ ),  $\delta$  8.97-8.96 (d,  $J=5$  Hz, 4H, Ar-H), 8.25-8.23 (d,  $J=10$  Hz, 4H, Ar-H), 8.06-8.03 (d,  $J=15$  Hz, 2H, vinyl-H), 7.84 (s, 4H, Ar-H), 7.63-7.60 (d,  $J=15$  Hz, 2H, vinyl-H), 4.49-4.46 (t, 4H,  $\text{N}^+\text{-CH}_2$ ), 1.89-1.87 (t, 4H,  $\text{CH}_2$ ), 1.26-1.21 (m, 16 H,  $\text{CH}_2$ ), 0.84-0.81 (t, 6H,  $\text{CH}_3$ ). MALDI-TOF:  $m/z$  calcd for  $\text{C}_{34}\text{H}_{46}\text{N}_2^{2+}$ : 482.74; found: 481.934; Anal. Calcd for  $\text{C}_{34}\text{H}_{46}\text{N}_2\text{Br}_2$ : C 63.55, H 7.22, N 4.36; Found: C 63.68, H 7.16, N 4.42.

**5:**  $^1\text{H}$  NMR (500MHz, DMSO- $d_6$ ),  $\delta$  7.82-7.81 (d,  $J=5$  Hz, 4H, Ar-H), 7.40-7.39 (d,  $J=5$  Hz, 4H, Ar-H), 7.15 (s, 2H, vinyl-H), 4.84-4.82 (t, 4H,  $\text{N}^+\text{-CH}_2$ ), 3.03-3.01 (m, 4H,  $\text{N}^+\text{-CH}_2\text{-CH}_2$ ), 2.53-2.47 (m, 20H,  $\text{CH}_2$ ), 2.19-2.17 (t, 6H,  $\text{CH}_3$ ). MALDI-TOF:  $m/z$  calcd for  $\text{C}_{28}\text{H}_{44}\text{N}_2^{2+}$ : 408.66; found: 408.862; Anal. Calcd for  $\text{C}_{28}\text{H}_{44}\text{N}_2\text{Br}_2$ : C 59.16, H 7.80, N 4.93; Found: C 59.29, H 7.75, N 4.98.

**6:**  $^1\text{H}$  NMR (500MHz, DMSO- $d_6$ ),  $\delta$  7.83-7.82 (d,  $J=5$  Hz, 4H, Ar-H), 7.40-7.39 (d,  $J=5$  Hz, 4H, Ar-H), 7.15 (s, 2H, vinyl-H), 4.84-4.82 (t, 4H,  $\text{N}^+\text{-CH}_2$ ), 3.03-3.01 (m, 4H,  $\text{N}^+\text{-CH}_2\text{-CH}_2$ ), 2.53-2.47 (m, 24H,  $\text{CH}_2$ ), 2.19-2.17 (t, 6H,  $\text{CH}_3$ ). MALDI-TOF:  $m/z$  calcd for  $\text{C}_{30}\text{H}_{48}\text{N}_2^{2+}$ : 436.71; found: 436.432; Anal. Calcd for  $\text{C}_{30}\text{H}_{48}\text{N}_2\text{Br}_2$ : C 60.40, H 8.11, N 4.70; Found: C 60.32, H 8.13, N 4.65.

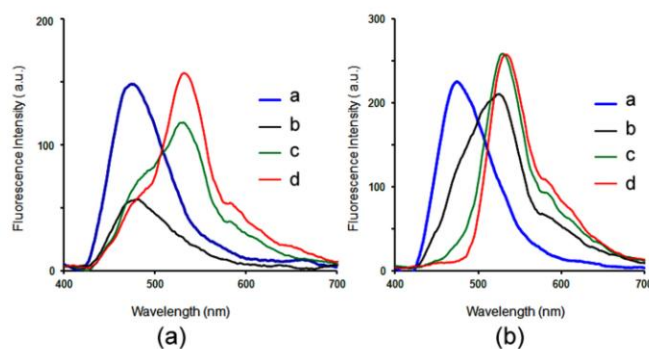

**Figure S1.** Fluorescence spectra changes of **1** (a) and **2** (b) with different concentrations in aqueous solution (a = 10  $\mu$ M, b = 0.1 mM, c = 0.3 mM, d = 0.5 mM);  $\lambda_{\text{ex}}$  = 398 nm.

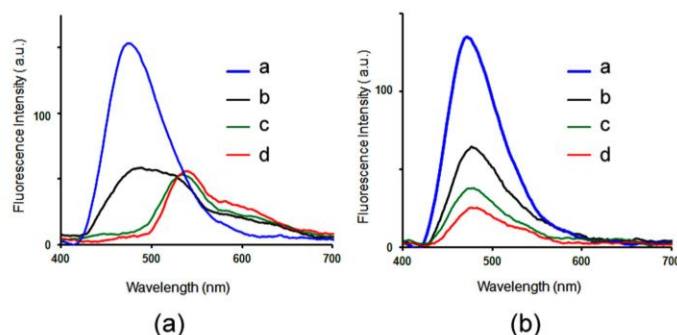

**Figure S2.** Fluorescence spectra changes of **3** (a) and **4** (b) with different concentrations in aqueous solution (a = 10  $\mu$ M, b = 0.1 mM, c = 0.3 mM, d = 0.5 mM);  $\lambda_{\text{ex}}$  = 398 nm.

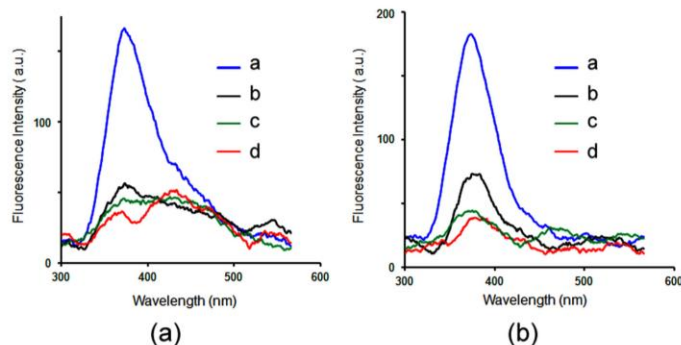

**Figure S3.** Fluorescence spectra changes of **5** (a) and **6** (b) with different concentrations in aqueous solution (a = 10  $\mu$ M, b = 0.1 mM, c = 0.3 mM, d = 0.5 mM);  $\lambda_{\text{ex}}$  = 320 nm.

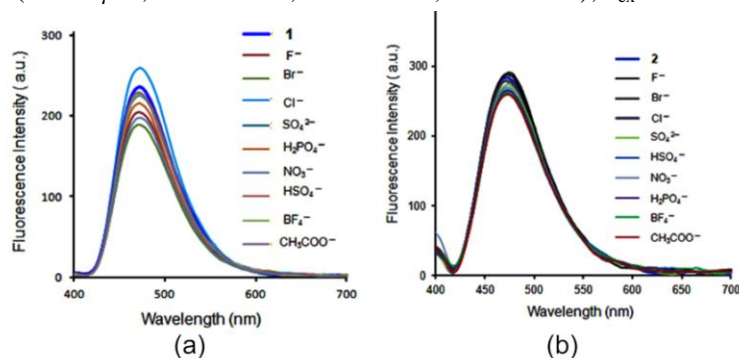

**Figure S4.** Fluorescence spectras of **1** (a) and **2** (b) (each of 10  $\mu$ M) with the addition of 20 equiv. of various anions as their tetrabutylammonium salts in aqueous solution at pH 7.4 (10 mM phosphate buffer).  $\lambda_{\text{ex}}$  = 398 nm.

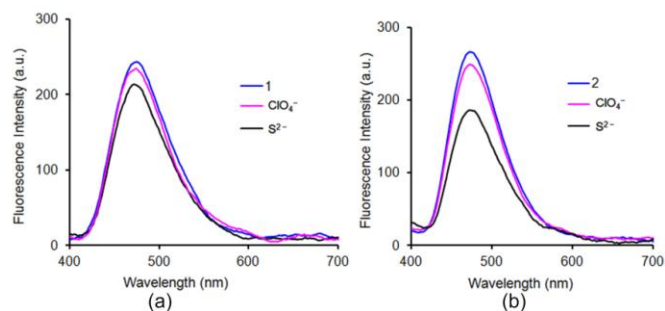

**Figure S5.** Fluorescence spectras of **1** (a) and **2** (b) (each of 10  $\mu\text{M}$ ) with the addition of 20 equiv. of  $\text{ClO}_4^-$  and  $\text{S}^{2-}$  as their sodium salts in aqueous solution at pH 7.4 (10 mM phosphate buffer).  $\lambda_{\text{ex}} = 398 \text{ nm}$ .

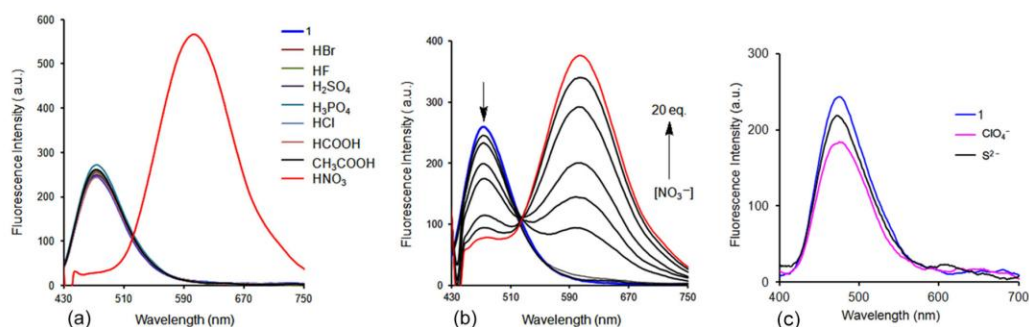

**Figure S6.** (a) Fluorescence response of **1** (10  $\mu\text{M}$ ) in aqueous solution with the addition of 20 equiv. of various acid species; (b) fluorescence spectra changes of **1** (10  $\mu\text{M}$ ) upon addition of increasing concentrations of  $\text{NO}_3^-$  (0–20 equiv.) as tetrabutylammonium salt in phosphate buffer solution (pH 6.0); (c) Fluorescence response of **1** (10  $\mu\text{M}$ ) in aqueous solution (pH $\approx$ 4.0, 10 mM phosphate buffer) with the addition of 20 equiv. of  $\text{ClO}_4^-$  and  $\text{S}^{2-}$  as their sodium salts.  $\lambda_{\text{ex}} = 398 \text{ nm}$ .

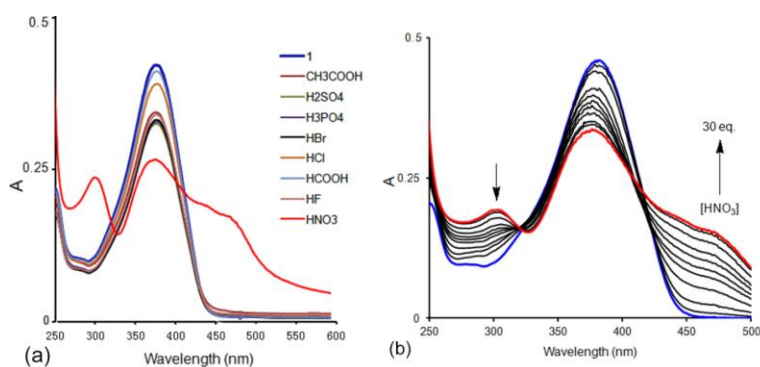

**Figure S7.** (a) UV-vis absorption spectra of **1** (10  $\mu\text{M}$ ) in aqueous solution with the addition of 30 equiv. of various acid species; (b) UV-vis absorption spectra changes of **1** (10  $\mu\text{M}$ ) upon addition of increasing concentrations of  $\text{HNO}_3$  (0–30 equiv.) in aqueous solution.

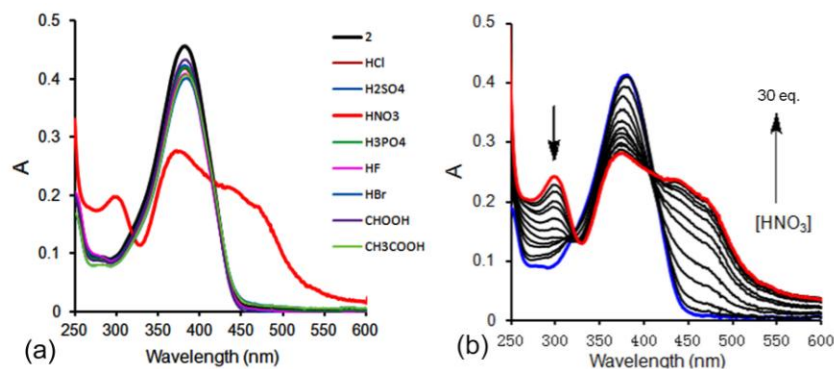

**Figure S8.** (a) UV-vis absorption spectra of **2** (10  $\mu\text{M}$ ) in aqueous solution with the addition of 30 equiv. of various acid species; (b) UV-vis absorption spectra changes of **2** (10  $\mu\text{M}$ ) upon addition of increasing concentrations of  $\text{HNO}_3$  (0–30 equiv.) in aqueous solution.

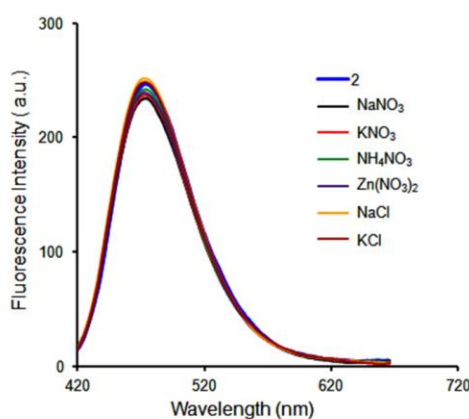

**Figure S9.** Fluorescence response of **2** (10  $\mu\text{M}$ ) in aqueous solution with the addition of 20 equiv. of various counter ions;  $\lambda_{\text{ex}} = 398 \text{ nm}$ .

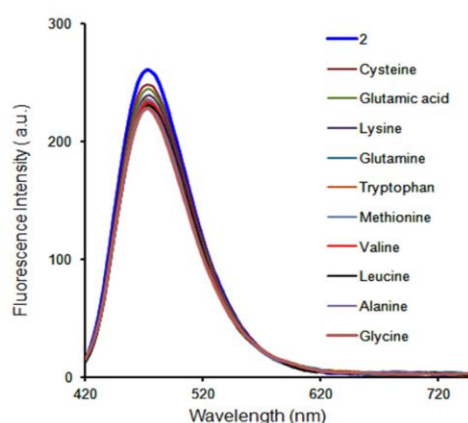

**Figure S10.** Fluorescence response of **2** (10  $\mu\text{M}$ ) in aqueous solution with the addition of 20 equiv. of various amino acids.  $\lambda_{\text{ex}} = 398 \text{ nm}$ .

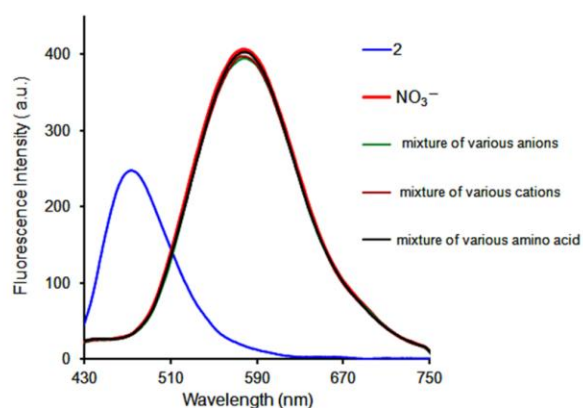

**Figure S11.** Fluorescence responses of **2** (10  $\mu\text{M}$ ) in phosphate buffer solution (pH 6.0) to various tested anions (mixture of  $\text{Cl}^-$ ,  $\text{SO}_4^{2-}$ ,  $\text{HSO}_4^-$ ,  $\text{H}_2\text{PO}_4^-$ ,  $\text{Br}^-$ ,  $\text{F}^-$ ,  $\text{CH}_3\text{COO}^-$ ,  $\text{ClO}_4^-$  and  $\text{S}^{2-}$  each of 200  $\mu\text{M}$ ), cations (mixture of  $\text{NaNO}_3$ ,  $\text{KNO}_3$ ,  $\text{NH}_4\text{NO}_3$ ,  $\text{Zn}(\text{NO}_3)_2$ ,  $\text{NaCl}$  and  $\text{KCl}$ , each of 200  $\mu\text{M}$ ) and amino acids (mixture of cysteine, glutamic acid, lysine, glutamine, tryptophan, methionine, valine, leucine, alanine, glycine, each of 200  $\mu\text{M}$ ) in the presence of 200  $\mu\text{M}$   $\text{NO}_3^-$ .

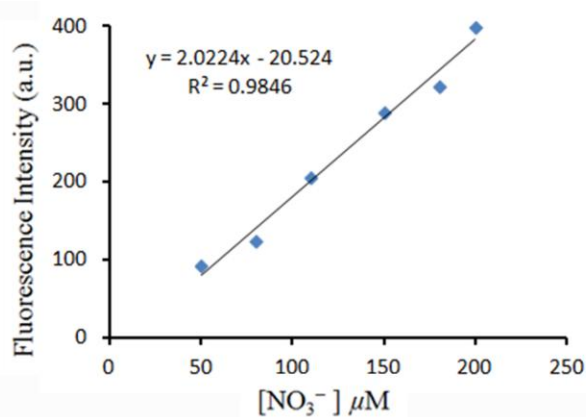

(a)

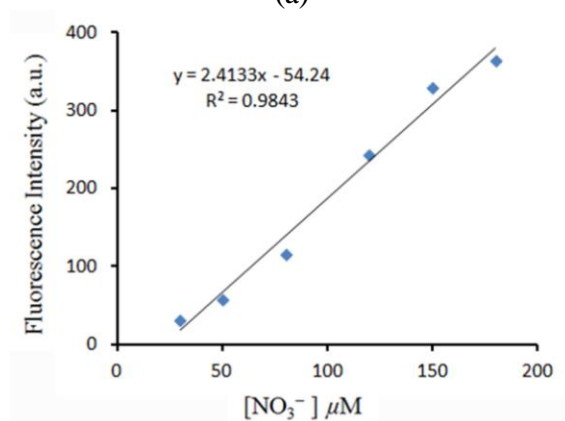

(b)

**Figure S12.** Plot of fluorescence intensity change (605 nm) of **1** (a) and **2** (b) with varied concentrations of  $\text{NO}_3^-$  at 298K, the limit of detection of  $\text{NO}_3^-$  was calculated to be  $6.19 \times 10^{-7}$  M for sensor **1** and  $9.25 \times 10^{-7}$  M for sensor **2**, respectively, by the formula ( $3\sigma/K$ ).

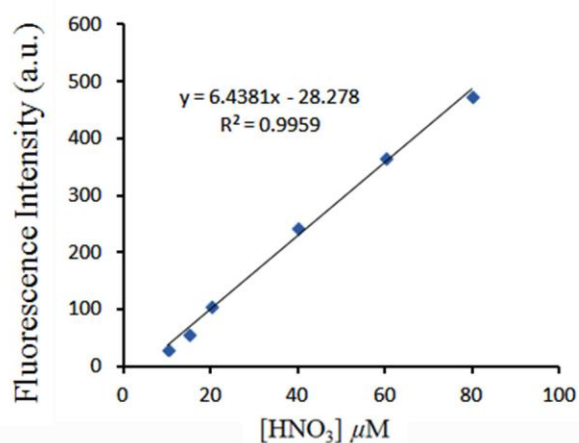

**Figure S13.** Plot of fluorescence intensity change (605 nm) of **2** with varied concentrations of  $\text{HNO}_3$  at 298K, the limit of detection of  $\text{HNO}_3$  was calculated to be  $3.95 \times 10^{-7}$  M by the formula ( $3\sigma/K$ ).

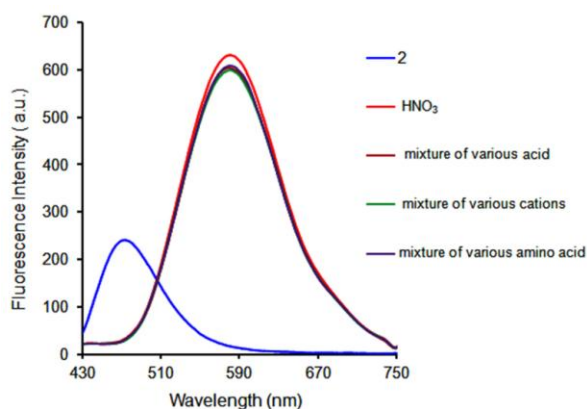

**Figure S14.** Fluorescence responses of **2** (10  $\mu\text{M}$ ) in aqueous solution to various tested acids (mixture of  $\text{HCl}$ ,  $\text{H}_2\text{SO}_4$ ,  $\text{H}_3\text{PO}_4$ ,  $\text{HBr}$ ,  $\text{HF}$ ,  $\text{CH}_3\text{COOH}$  and  $\text{HCOOH}$ , each of 200  $\mu\text{M}$ ), cations (mixture of  $\text{NaNO}_3$ ,  $\text{KNO}_3$ ,  $\text{NH}_4\text{NO}_3$ ,  $\text{Zn}(\text{NO}_3)_2$ ,  $\text{NaCl}$  and  $\text{KCl}$ , each of 200  $\mu\text{M}$ ) and amino acids (mixture of cysteine, glutamic acid, lysine, glutamine, tryptophan, methionine, valine, leucine, alanine, glycine) in the presence of 200  $\mu\text{M}$   $\text{HNO}_3$ .  $\lambda_{\text{ex}} = 398$  nm.

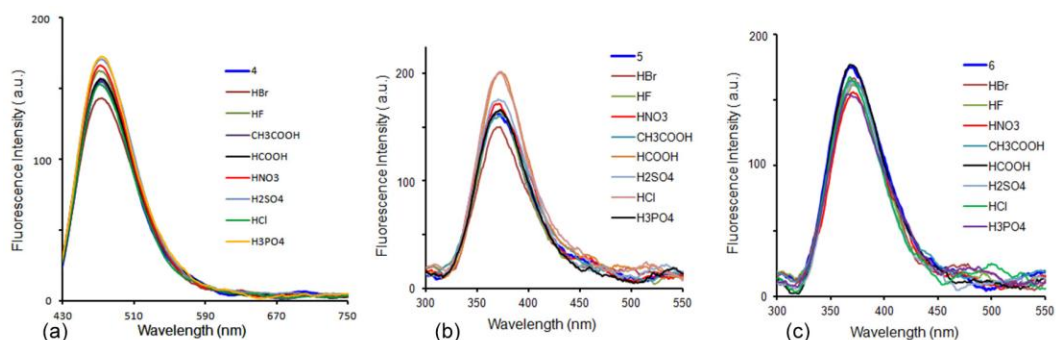

**Figure S15.** Fluorescence response of **4** (a), **5** (b) and **6** (c) (each of 10  $\mu\text{M}$ ) in aqueous solution with the addition of 20 equiv. of various acids.

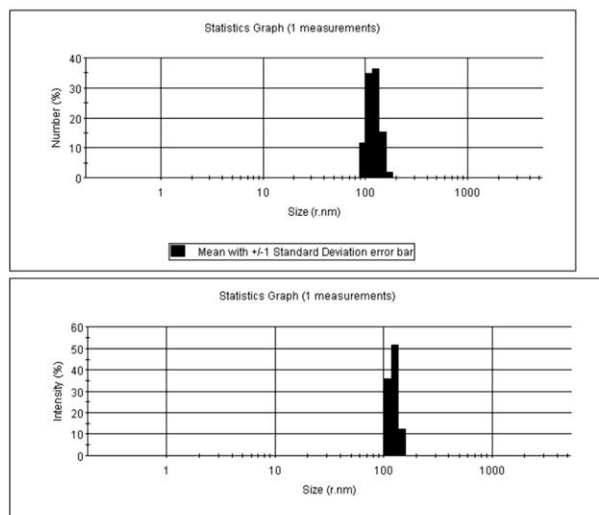

(a)

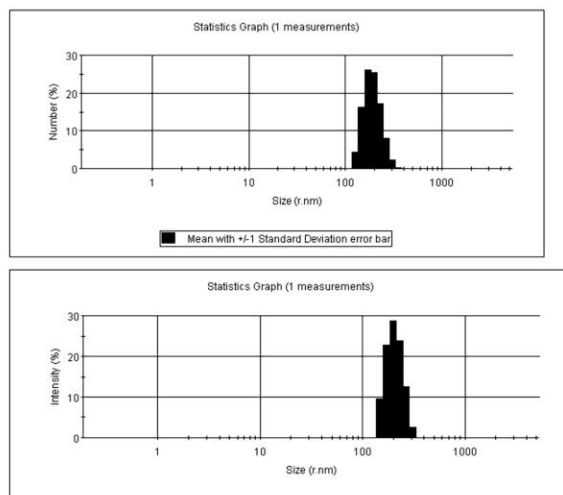

(b)

**Figure S16.** Distribution of hydrodynamic radii of aggregates of **1** (a) and **2** (b) (each of 10  $\mu\text{M}$ ) as measured through DLS at a scattering angle of  $90^\circ$  after addition of addition of 20 equiv. of  $\text{HNO}_3$  to the samples in aqueous solution.

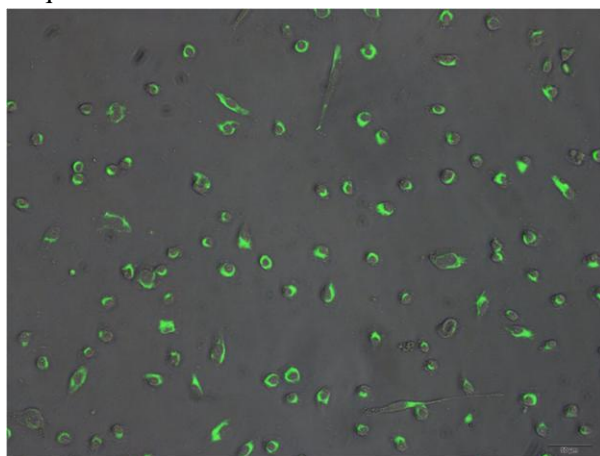

**Figure S17.** The overlay of fluorescence and bright-field images of DU145 cell lines incubated with **2** (5  $\mu\text{M}$ ) for 30 min at  $37^\circ\text{C}$ .

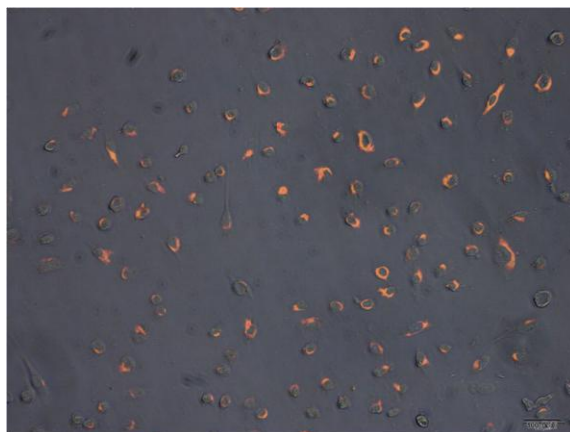

**Figure S18.** The overlay of fluorescence and bright-field images of DU145 cell lines incubated with **2** and then subsequently treated with  $\text{KNO}_3$  ( $10\ \mu\text{M}$ ) and  $\text{HNO}_3$  ( $10\ \mu\text{M}$ ) for 30 min at  $37\ ^\circ\text{C}$ .

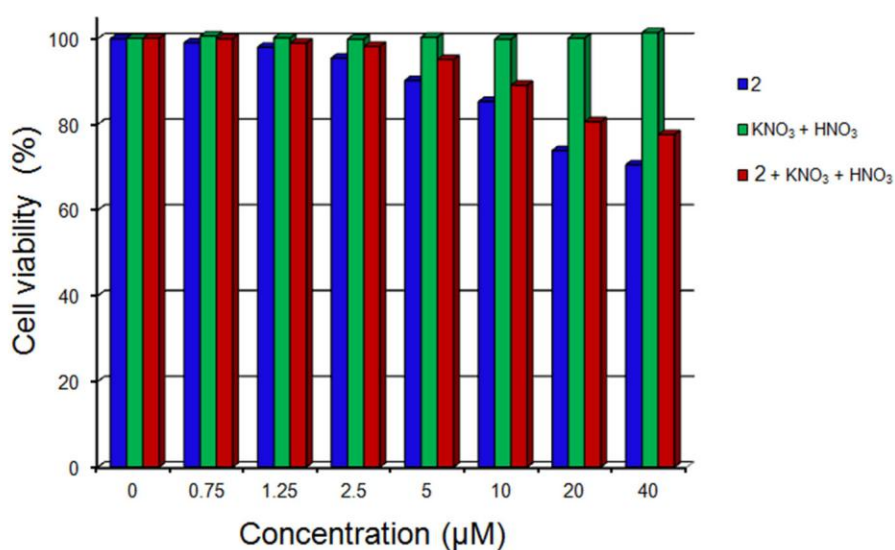

**Figure S19.** Percentage of DU145 cell viability remaining after cell treatment with **2**,  $\text{KNO}_3$  and  $\text{HNO}_3$ , and **2** in the presence  $\text{KNO}_3$  and  $\text{HNO}_3$  (untreated cells were considered to have 100% survival). Cell viability was assayed by the MTT method (values: mean  $\pm$  standard deviation).

## References

1. Samanta, S. K.; Bhattacharya, S. *J. Mater. Chem.* **2012**, *22*, 25277–25287
2. Ichimura, K.; Watanabe, S. J. *J. Polym. Sci., Polym. Chem. Ed.* **1982**, *20*, 1419–1432.

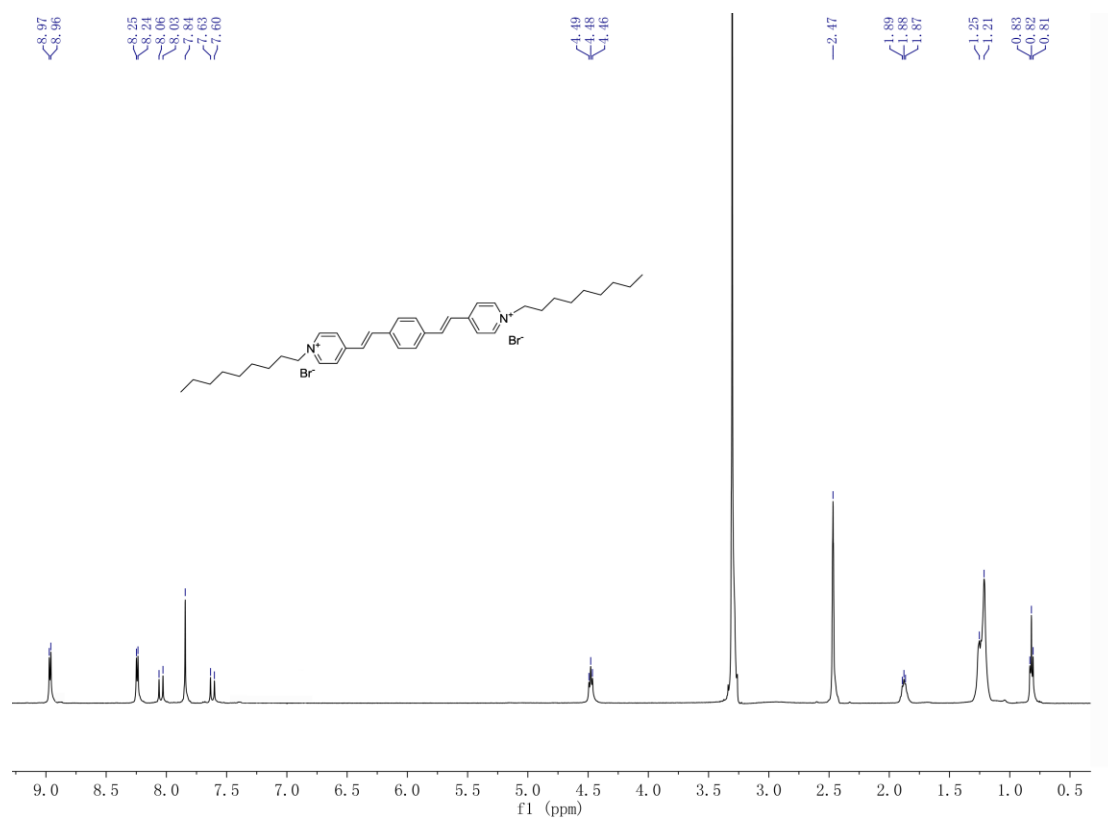

**Figure S20.** <sup>1</sup>H NMR spectra of **2** in DMSO-d<sub>6</sub>

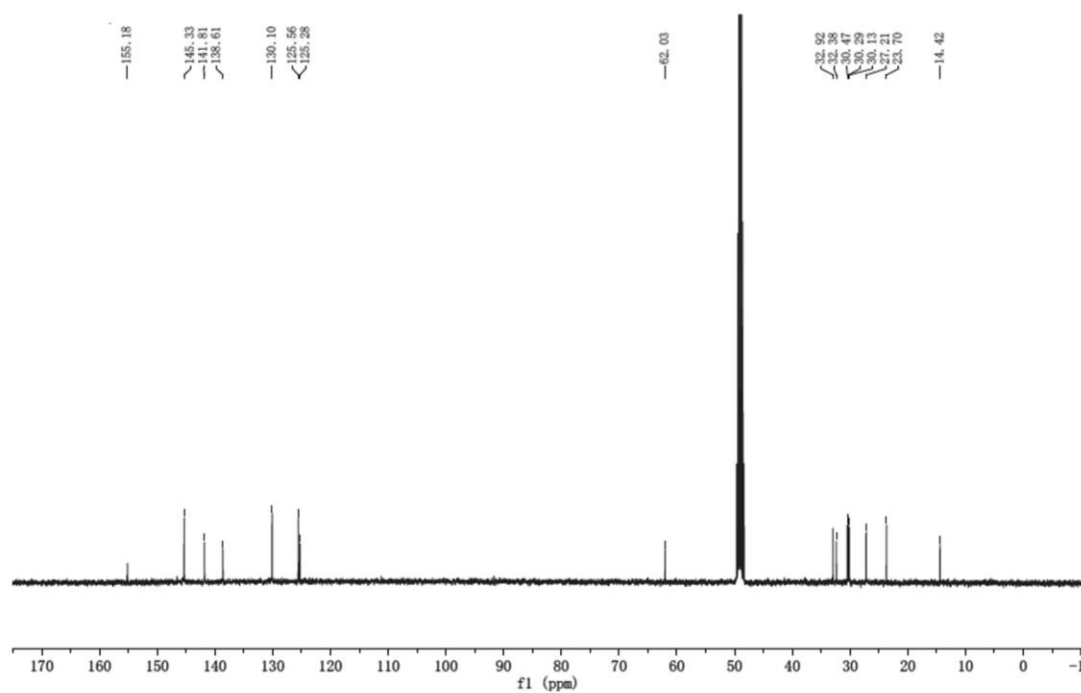

**Figure S21.** <sup>13</sup>C NMR spectra of **2** in CD<sub>3</sub>OD

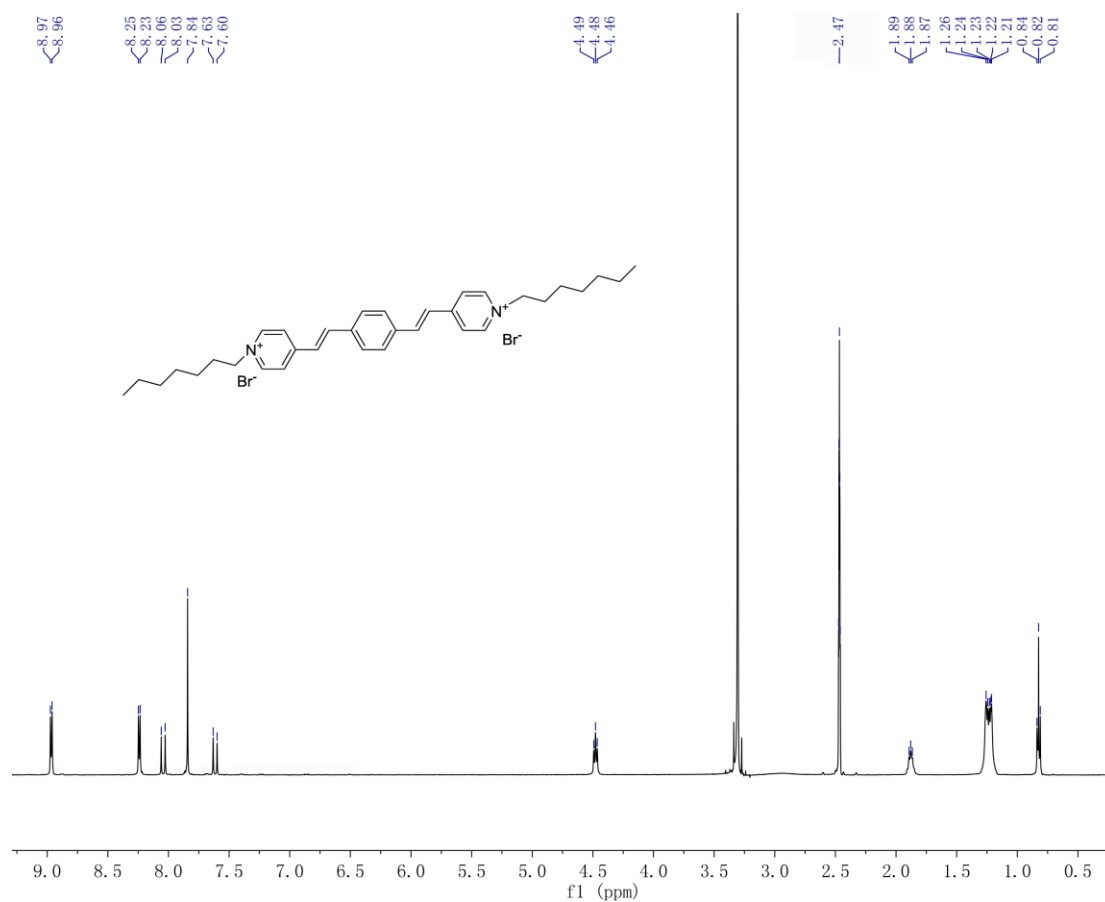

**Figure S22.** <sup>1</sup>H NMR spectra of **4** in DMSO-<sub>d</sub><sub>6</sub>

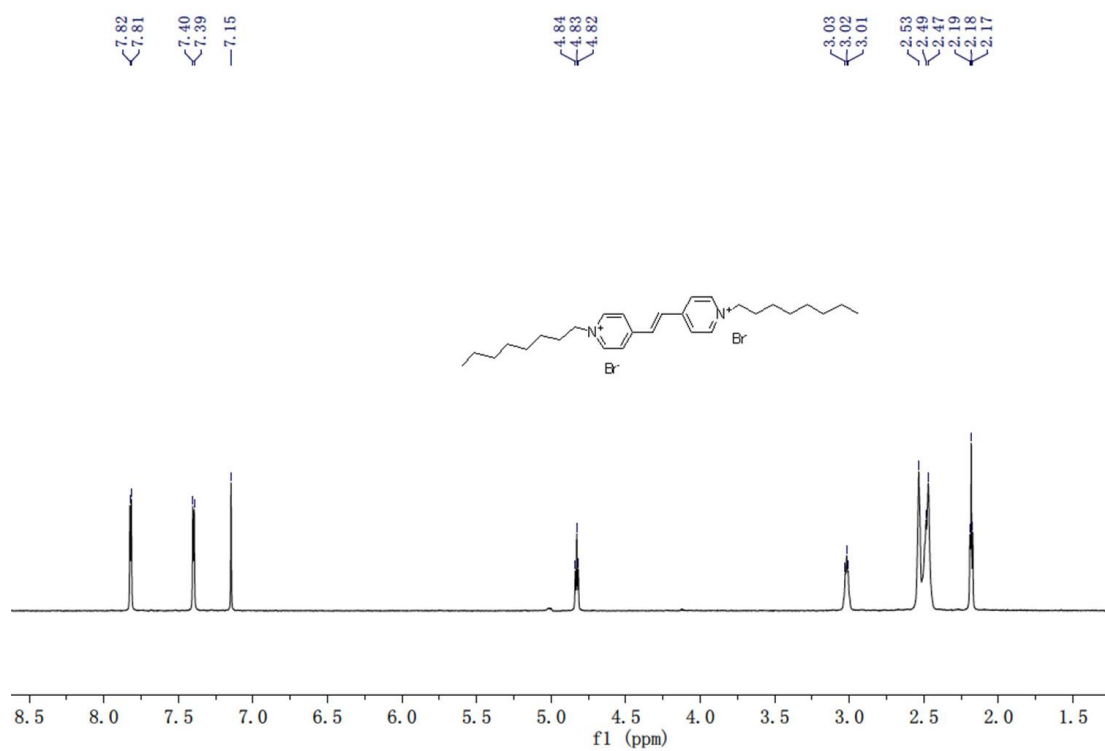

**Figure S23.** <sup>1</sup>H NMR spectra of **5** in DMSO-<sub>d</sub><sub>6</sub>

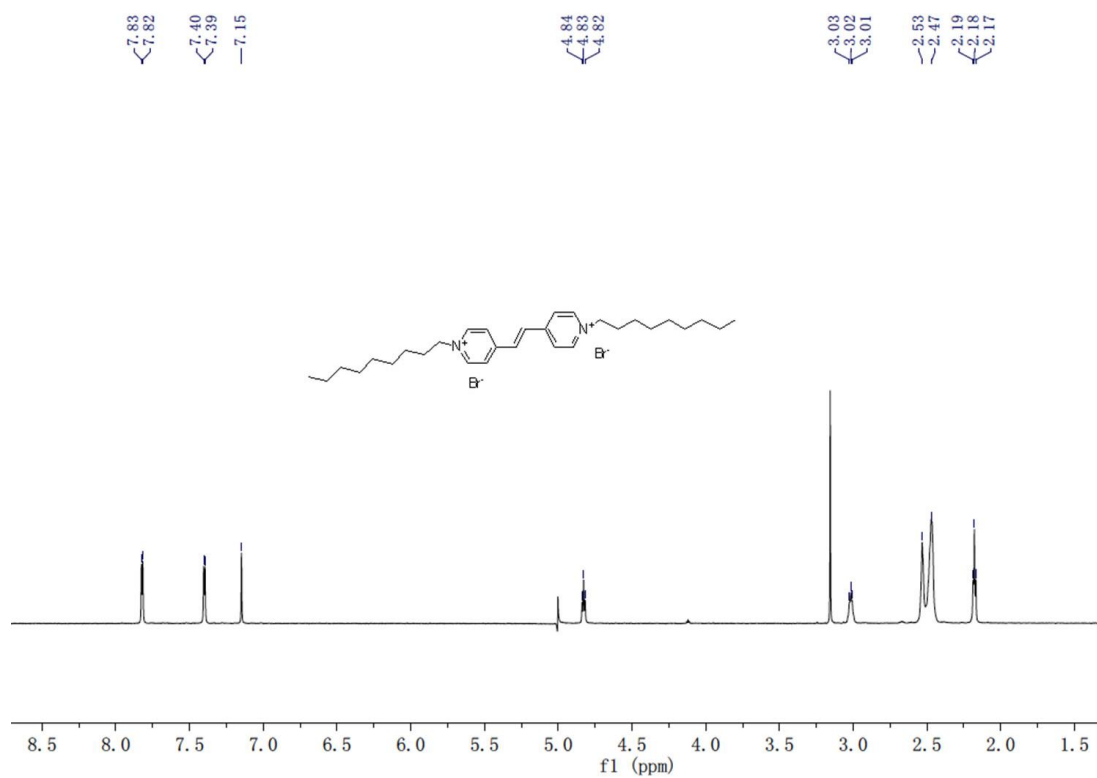

**Figure S24.**  $^1\text{H}$  NMR spectra of **6** in  $\text{DMSO}-d_6$
